# Supplementary material for: Characteristics and Pathogenicity of Discula theae-sinensis Isolated from Tea Plant (Camellia sinensis) and Interaction with Colletotrichum spp
Source: MDPI journal article supplement (doi:10.3390/plants12193427), 2023-09-28
Supplement: s1 [file s1]

**Table S1.** Primers used in this study

| Gene  | Primer   | Sequence (5'→3')                | Reference |
|-------|----------|---------------------------------|-----------|
| CAL   | CL1C     | GAA TTC AAG GAG GCC TTC TC      | [1]       |
|       | CL2C     | CTT CTG CAT CAT GAG CTG GAC     | [1]       |
| GAPDH | GDF      | GCC GTC AAC GAC CCC TTC ATT GA  | [2]       |
|       | GDR      | GGG TGG AGT CGT ACT TGA GCA TGT | [2]       |
| ITS   | ITS-1    | CTT GGT CAT TTA GAG GAA GTA A   | [3]       |
|       | ITS-4    | TCC TCC GCT TAT TGA TAT GC      | [4]       |
| TUB2  | T1       | AAC ATG CGT GAG ATT GTA AGT     | [5]       |
|       | Bt2b     | ACC CTC AGT GTA GTG ACC CTT GGC | [6]       |
| EF1   | EF1-728F | CAT CGA GAA GTT CGA GAA GG      | [7]       |
|       | EF1-986R | TAC TTG AAG GAA CCC TTA CC      | [7]       |
| RPB2  | RPB2-P2F | GGA AGT GGT GGA GGA GTA CGA G   | [8]       |
|       | RPB2-P3R | CTG GTT GTG GTC GGG GAA GGG     | [8]       |
| LSU   | LROR     | GTA CCC GCT GAA CTT AAG C       | [9]       |
|       | LR7      | TAC TAC CAC CAA GAT CT          | [9]       |

## References

1. Weir, B.S.; Johnston, P.R.; Damm, U. The *Colletotrichum gloeosporioides* species complex. *Stud. Mycol.* **2012**, *73*, 115–180.
2. Templeton, M.D.; Rikkerink, E.; Solon, S.L.; Crowhurst, R.N. Cloning and molecular characterization of the glyceraldehyde-3-phosphate dehydrogenase-encoding gene and cDNA from the plant pathogenic fungus *Glomerella cingulata*. *Gene* **1992**, *122*, 225–230.
3. Gardes, M.; Bruns, T.D. ITS primers with enhanced specificity for basidiomycetes—Application to the identification of mycorrhizae and rusts. *Mol. Ecol.* **1993**, *2*, 113–118.
4. White, T.; Bruns, T.; Lee, S.; Taylor, J. Amplification and direct sequencing of fungal ribosomal RNA genes for phylogenetics. *Pcr. Protocols*. **1990**, *18*, 315–322.
5. O'Donnell, K.; Cigelnik, E. Two divergent intragenomic rDNA ITS2 types within a monophyletic lineage of the fungus *Fusarium* are nonorthologous. *Mol. Phylogenet. Evol.* **1997**, *7*, 103–116.
6. Glass, N.L.; Donaldson, G.C. Development of primer sets designed for use with the PCR to amplify conserved genes from filamentous ascomycetes. *Appl. Environ. Microbiol* **1995**, *61*, 1323–1330.
7. Carbone, I.; Kohn, L.M. A method for designing primer sets for speciation studies in filamentous ascomycetes. *Mycologia* **1999**, *91*, 553–556.
8. Liu, Y.J.; Whelen, S.; Hall, B.D. Phylogenetic relationships among ascomycetes: Evidence from an RNA polymerase II subunit. *Mol. Biol. Evol.* **1999**, *16*, 1799–1808.
9. Vilgalys, R.; Hester, M. Rapid genetic identification and mapping of enzymatically amplified ribosomal DNA from several *Cryptococcus* species. *J. Bacteriol.* **1990**, *172*, 4238–4246.

**Table S2. Isolates *Diaporthales* spp. studied and GenBank accession numbers of the generated sequences**

| Species                       | Accession number | GenBank accession |          |          |          |
|-------------------------------|------------------|-------------------|----------|----------|----------|
|                               |                  | ITS               | LSU      | EF1      | RPB2     |
| <i>Discula theae-sinensis</i> | MAFF238240       |                   | AB511919 |          |          |
|                               | MAFF238241       |                   | AB511920 |          |          |
|                               | MAFF238242       |                   | AB511921 |          |          |
|                               | MAFF238243       |                   | AB511922 |          |          |
|                               | DX1              | ON453684          | ON340629 | ON366583 | ON568236 |
|                               | DX2              | ON453700          | ON340645 | ON366599 | ON568247 |
|                               | DX3              | ON453689          | ON340634 | ON366588 | ON568240 |
|                               | DX4              | ON453685          | ON340630 | ON366584 | ON568237 |
|                               | DX5              | ON453708          | ON340654 | ON366608 | ON568254 |
|                               | DX6              | ON453691          | ON340636 | ON366590 | -        |
|                               | DX7              | ON453688          | ON340633 | ON366587 | ON568239 |
|                               | DX8              | ON453699          | ON340644 | ON366598 | ON568246 |
|                               | DX9              | ON453686          | ON340631 | ON366585 | ON568238 |
|                               | DX10             | ON453687          | ON340632 | ON366586 | -        |
|                               | DX11             | ON453723          | ON340669 | ON366623 | ON568266 |
|                               | DX12             | ON453738          | ON340688 | ON366642 | ON568282 |
|                               | DX13             | ON453712          | ON340658 | ON366612 | ON568258 |
|                               | DX14             | ON453741          | ON340691 | ON366645 | ON568285 |
|                               | DX15             | ON453740          | ON340690 | ON366644 | ON568284 |
|                               | DX16             | ON453739          | ON340689 | ON366643 | ON568283 |
|                               | DX23             | ON453704          | ON340649 | ON366603 | ON568250 |
|                               | DX24             | ON453711          | ON340657 | ON366611 | ON568257 |
|                               | DX25             | ON453709          | ON340655 | ON366609 | ON568255 |
|                               | DX26             | ON453702          | ON340647 | ON366601 | ON568249 |
|                               | DX27             | ON453710          | ON340656 | ON366610 | ON568256 |
|                               | DX28             | ON453713          | ON340659 | ON366613 | ON568259 |
|                               | DX29             | ON453725          | ON340671 | ON366625 | -        |
|                               | DX30             | ON453737          | ON340683 | ON366637 | ON568277 |
|                               | DX31             | ON453714          | ON340660 | ON366614 | ON568260 |
|                               | DX32             | ON453721          | ON340667 | ON366621 | ON568264 |
|                               | DX33             | ON453724          | ON340670 | ON366624 | ON568267 |
|                               | DX34             | ON453693          | ON340638 | ON366592 | ON568242 |
|                               | DX35             | ON453703          | ON340648 | ON366602 | -        |
|                               | DX36             | ON453705          | ON340650 | ON366604 | ON568251 |
|                               | DX37             | ON453706          | ON340651 | ON366605 | ON568252 |
|                               | DX38             | ON453707          | ON340653 | ON366607 | ON568253 |
|                               | DX39             | ON453734          | ON340680 | ON366634 | ON568275 |
|                               | DX40             | -                 | ON340652 | ON366606 | -        |
|                               | DX43             | ON598591          | ON340692 | ON366646 | -        |

|                                      |                  |          |          |          |          |
|--------------------------------------|------------------|----------|----------|----------|----------|
|                                      | DX44             | ON453742 | ON340693 | ON366647 | -        |
|                                      | DX45             | ON453720 | ON340666 | ON366620 | -        |
|                                      | DX46             | ON453728 | ON340674 | ON366628 | ON568270 |
|                                      | DX47             | ON453726 | ON340672 | ON366626 | ON568268 |
|                                      | DX49             | ON453695 | ON340640 | ON366594 | ON568243 |
|                                      | DX50             | ON453696 | ON340641 | ON366595 | ON568244 |
|                                      | DX51             | ON453694 | ON340639 | ON366593 | -        |
|                                      | DX52             | ON453731 | ON340677 | ON366631 | -        |
|                                      | DX54             | ON453697 | ON340642 | ON366596 | ON568245 |
|                                      | DX55             | ON453729 | ON340675 | ON366629 | ON568271 |
|                                      | DX56             | ON453698 | ON340643 | ON366597 | -        |
|                                      | DX57             | ON453715 | ON340661 | ON366615 | ON568261 |
|                                      | DX58             | ON453732 | ON340678 | ON366632 | ON568273 |
|                                      | DX59             | ON453690 | ON340635 | ON366589 | -        |
|                                      | DX60             | ON453733 | ON340679 | ON366633 | ON568274 |
|                                      | DX61             | ON453692 | ON340637 | ON366591 | ON568241 |
|                                      | DX62             | ON453719 | ON340665 | ON366619 | -        |
|                                      | DX63             | ON453716 | ON340662 | ON366616 | -        |
|                                      | DX64             | ON453701 | ON340646 | ON366600 | ON568248 |
|                                      | DX65             | ON453718 | ON340664 | ON366618 | ON568263 |
|                                      | DX66             | ON453730 | ON340676 | ON366630 | ON568272 |
|                                      | DX70             | ON598587 | ON340684 | ON366638 | ON568278 |
|                                      | DX71             | ON598590 | ON340687 | ON366641 | ON568281 |
|                                      | DX72             | ON598588 | ON340685 | ON366639 | ON568279 |
|                                      | DX73             | ON598589 | ON340686 | ON366640 | ON568280 |
|                                      | DX74             | ON453722 | ON340668 | ON366622 | ON568265 |
|                                      | DX78             | ON453735 | ON340681 | ON366635 | ON568276 |
|                                      | DX79             | ON453736 | ON340682 | ON366636 | -        |
|                                      | DX81             | ON453727 | ON340673 | ON366627 | ON568269 |
|                                      | DX82             | ON453717 | ON340663 | ON366617 | ON568262 |
|                                      | DX84             | ON453743 | ON340694 | ON366648 | ON568286 |
| <i>Diaporthe phaseolorum</i>         | CBS 127465       | -        | MH877950 | -        | -        |
| <i>Diaporthe musigena</i>            | CBS 129519       | -        | MH876824 | -        | -        |
| <i>Phomopsis cuppatea</i>            | CBS 117499       | -        | MH874572 | -        | -        |
| <i>Nigrospora rubi</i>               | CGMCC<br>3.18326 | -        | KX986102 | -        | -        |
| <i>Nigrospora camelliae-sinensis</i> | CGMCC<br>3.18125 | -        | KY806262 | -        | -        |
| <i>Valsella salicis</i>              | AR3514           | -        | AF408389 | -        | -        |

**Table S3. Isolates *Colletotrichum* spp. studied and GenBank accession numbers of the generated sequences**

| Species              | Accession number          | GenBank accession |          |          |          |
|----------------------|---------------------------|-------------------|----------|----------|----------|
|                      |                           | ITS               | CAL      | GAPDH    | TUB2     |
| <i>C. aenigma</i>    | ICMP 18608                | JX010244          | JX009683 | JX010044 | JX010389 |
|                      | CX12                      | ON329714          | ON420249 | ON394453 | ON420396 |
|                      | CX13                      | ON329715          | ON420250 | ON394454 | ON420397 |
| <i>C. camellia</i>   | ICMP 10643, LF897, LC3667 | JX010224          | JX009630 | JX009908 | JX010436 |
|                      | CX5                       | ON329717          | ON420252 | ON394456 | ON420398 |
|                      | CX6                       | ON329718          | ON420253 | ON394457 | ON420399 |
|                      | CX7                       | ON329719          | ON420254 | ON394458 | ON420400 |
|                      | CX8                       | ON329724          | ON420259 | ON394463 | ON420405 |
|                      | CX10                      | ON329720          | ON420255 | ON394459 | ON420401 |
|                      | CX25                      | ON329727          | ON420262 | ON394466 | ON420408 |
|                      | CX32                      | ON329723          | ON420258 | ON394462 | ON420404 |
|                      | CX37                      | ON329721          | ON420256 | ON394460 | ON420402 |
|                      | CX38                      | ON329722          | ON420257 | ON394461 | ON420403 |
|                      | CX39                      | ON329725          | ON420260 | ON394464 | ON420406 |
|                      | CX47                      | ON329726          | ON420261 | ON394465 | ON420407 |
| <i>C. fructicola</i> | ICMP 18646, CBS 125397    | JX010173          | JX009674 | JX010032 | JX010409 |
|                      | CX1                       | ON329690          | ON420225 | ON394429 | ON420372 |
|                      | CX2                       | ON329709          | ON420244 | ON394448 | ON420391 |
|                      | CX3                       | ON329692          | ON420227 | ON394431 | ON420374 |
|                      | CX4                       | ON329691          | ON420226 | ON394430 | ON420373 |
|                      | CX9                       | ON329710          | ON420245 | ON394449 | ON420392 |
|                      | CX11                      | ON329695          | ON420230 | ON394434 | ON420377 |
|                      | CX14                      | ON329703          | ON420238 | ON394442 | ON420385 |
|                      | CX15                      | ON329696          | ON420231 | ON394435 | ON420378 |
|                      | CX16                      | ON329729          | -        | ON394468 | ON420410 |
|                      | CX17                      | ON329731          | -        | ON394470 | ON420412 |
|                      | CX18                      | ON329711          | ON420246 | ON394450 | ON420393 |
|                      | CX19                      | ON329704          | ON420239 | ON394443 | ON420386 |
|                      | CX20                      | ON329697          | ON420232 | ON394436 | ON420379 |
|                      | CX21                      | ON329698          | ON420233 | ON394437 | ON420380 |
|                      | CX22                      | ON329699          | ON420234 | ON394438 | ON420381 |
|                      | CX23                      | ON329712          | ON420247 | ON394451 | ON420394 |
|                      | CX24                      | ON329700          | ON420235 | ON394439 | ON420382 |
|                      | CX26                      | ON329694          | ON420229 | ON394433 | ON420376 |
|                      | CX27                      | ON329713          | ON420248 | ON394452 | ON420395 |
|                      | CX28                      | ON329693          | ON420228 | ON394432 | ON420375 |
|                      | CX29                      | ON329706          | ON420241 | ON394445 | ON420388 |
|                      | CX30                      | ON329705          | ON420240 | ON394444 | ON420387 |
|                      | CX36                      | ON329708          | ON420243 | ON394447 | ON420390 |

|                        |                         |          |          |          |          |
|------------------------|-------------------------|----------|----------|----------|----------|
|                        | CX40                    | ON329707 | ON420242 | ON394446 | ON420389 |
|                        | CX42                    | ON329701 | ON420236 | ON394440 | ON420383 |
|                        | CX46                    | ON329730 | -        | ON394469 | ON420411 |
|                        | CX48                    | ON329702 | ON420237 | ON394441 | ON420384 |
| <i>C. gigasporum</i>   | CBS 125475              | KF687723 | KF687813 | KF687836 | KF687874 |
|                        | CX34                    | ON329734 | ON420266 | ON394473 | ON420414 |
| <i>C. henanense</i>    | LC2820                  | KM610182 | KM610176 | KM610178 | KM610184 |
|                        | CX31                    | ON329728 | ON420263 | ON394467 | ON420409 |
| <i>C. karstii</i>      | CBS 132134              | HM585409 | HM582013 | HM585391 | HM585428 |
|                        | CX45                    | ON329732 | ON420264 | ON394471 | -        |
| <i>C. siamense</i>     | ICMP 18578*, CBS 130417 | JX010171 | FJ917505 | JX009924 | JX010404 |
|                        | CX41                    | ON329716 | ON420251 | ON394455 | -        |
| <i>C. tropicicola</i>  | L58, LC0598*            | JN050240 | JN050229 | JN050223 | JN050246 |
|                        | CX33                    | ON329733 | ON420265 | ON394472 | ON420413 |
| <i>C. xanthorroeae</i> | ICMP 17903, CBS 127831  | JX010261 | JX009653 | JX009927 | JX010448 |

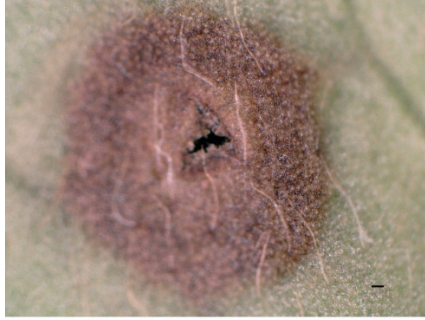

C

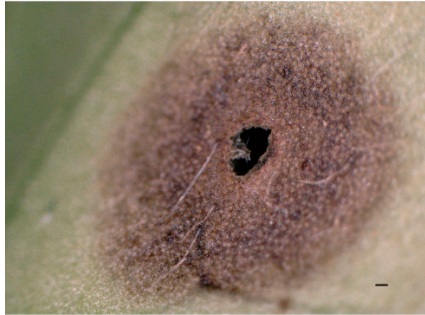

C+Dt

**Figure S1. Details of lesions of inoculation with Cc and dual inoculations of Cc and Dt**
